# Supplementary material
Source: publisher site journal article supplement (https://www.spandidos-publications.com/2305/downloadSupplementary)
Supplement: Supplementary file 1 [file downloadSupplementary]

## Sheet: Supplementary table I
Table SI. Cloning primers.
ABRACL F	GTAGGATCCGCCGTCTTTCTCTTTGCCTC
ABRACL R	GTAGAATTCTGCCTGCAATTCCTAACCAG
MITD1 F	GTAGGATCCCAGACCCGCTCAACTTCATC
MITD1 R	GTAGAATTCCAAATTAGGCTACCACCCATCA
ZNF524 F	GTAGGATCCCACTGCTCAATGGACACCC
ZNF524 R	GTAGAATTCGAAGACCACCGGAAACAAGG
EMP1 F	GTAGGATCCTGCGGTCACATACTTCCAGA
EMP1 R	GTAGAATTCCAGTGCATGACCCAGAAGTG
HSPB6 F	GTAGAATTCATGGAGATCCCTGTGCCTGT
HSPB6 R	GTACTCGAGTAGGGTAGTGCTGGTAGGGT
CXorf38 F	GTAGGATCCAAGTGGGAGACATGGTGCTG
CXorf38 R	GTACTCGAGTCCCAGGTTCAAGCGATTCT
TRIM38 F	GTAGAATTCATAGAGGTGCAGGTGAGGTG
TRIM38 R	GTACTCGAGTATCTTGCTTTGCCCCAGTC
ZNF182 F	GTAGGATCCAAGCATGACACCAGCATCTG
ZNF182 R	GTACTCGAGATATCTATGGTTCCGCGCCT
ZNF195 F	GTAGGATCCATCTAGCGGGGCCTTTGTC
ZNF195 R	GTACTCGAGTGCGAGCAGATACTAACGGC
SPRN F	GTAGAATTCCCCACGAAGATGAACTGGG
SPRN R	GTATCTAGAAGAACCAGCCTGATGTCGC
PTPN6 F	GTAGAATTCTAGCTGCACCTCCTCATTCC
PTPN6 R	GTACTCGAGGTTGTGAGTCTGTCCATCGC
LIPT1 F	GTAGCGGCCGCCTGAATCTCGCTCTGTTGCC
LIPT1 R	GTACTCGAGACAATGTGCAAGTATGAGACA
AGAP6 F	GTAGAATTCGTGGGCTTCAGTCTGTAGGT
AGAP6 R	GTATCTAGATGTGTGACTTGGGCAATGTG
CLEC2D F	GTAGGATCCTCACTCATAGAAACTGGAGGCA
CLEC2D R	GTAGAATTCATGATTGCAAGACCTCCCCA
EHBP1 F	GTAGCGGCCGCTCCTTTGCTTTGGACCCTCT
EHBP1 R	GTACTCGAGAAGGGTGGTGGTGGTAAAGT
GSDMB F	GTAGGATCCTGAGGTCAGAGAGGAGTTGG
GSDMB R	GTACTCGAGGATGGCAGTGAGGACAGACT
OFD1 F	GTAGGATCCACGTTCAGCACCTTTGTTCC
OFD1 R	GTAGCGGCCGCTGGGCAGCAAACATGGTTAC
OGT F	GTAGGATCCCCTCGAGAAGCTCCAGATGG
OGT R	GTAGCGGCCGCACCTTCCAGACCTATGCACC
